# Supplementary material for: Sex-Dependent Depression-Like Behavior Induced by Respiratory Administration of Aluminum Oxide Nanoparticles
Source: PubMed Central journal article supplement (PMC4690947; doi:10.3390/ijerph121215011), 2015-12-09
Supplement: ijerph-12-15011-s001.pdf [file ijerph-12-15011-s001.pdf]

## Sex-Dependent Depression-Like Behavior Induced by Respiratory Administration of Aluminum Oxide Nanoparticles

**Table S1.** Modulated global expression genes in HBE involved in mental disorders.

| Disease Term        | Involved Genes                                                            |
|---------------------|---------------------------------------------------------------------------|
| Schizophrenia       | SNAP29, UFD1L, ZDHHC8, PDLIM5, GRIN2A, GNAS, HSPA1A, CHRFAM7A, GDNF, SOD2 |
| Alzheimer's Disease | DLST, NOS3, HSPA1A, CHRFAM7A, PTEN, SOD2                                  |
| Bipolar disorder    | GRIN2A, NOS3, DGKH, CHRFAM7A                                              |
| Parkinson's disease | NOS3, HSPA1A, SOD2                                                        |
| Dementia            | NOS3, HSPA1A                                                              |
| Schizophrenia       | ZDHHC8, PDLIM5                                                            |
| Depressive disorder | HSPA1A, CHRFAM7A                                                          |

**Table S2.** Functions and modulation of mental disorder related genes in HBE predicted by microarray.

| Gene Symbol | Fold Change | Regulation | Product                                                                                              |
|-------------|-------------|------------|------------------------------------------------------------------------------------------------------|
| SNAP29      | 3.20        | down       | synaptosomal-associated protein 29                                                                   |
| UFD1L       | 2.95        | down       | ubiquitin fusion degradation 1 like (yeast)                                                          |
| ZDHHC8      | 3.24        | down       | probable palmitoyltransferase ZDHHC8 isoform 2                                                       |
| PDLIM5      | 1.57        | down       | PDZ and LIM domain protein 5 isoform e                                                               |
| HSPA1A      | 2.47        | down       | heat shock 70 kDa protein 1A/1B                                                                      |
| PTEN        | 3.70        | down       | phosphatidylinositol 3,4,5-trisphosphate 3-phosphatase and dual-specificity protein phosphatase PTEN |
| GDNF        | 2.12        | down       | glial cell derived neurotrophic factor                                                               |
| SOD2        | 2.10        | down       | superoxide dismutase [Mn], mitochondrial isoform A precursor                                         |
| GNAS        | 2.43        | down       | protein ALEX isoform f                                                                               |
| NOS3        | 1.51        | down       | nitric oxide synthase, endothelial isoform 1                                                         |
| DLST        | 2.056       | down       | dihydrolipoyllysine-residue succinyltransferase component of 2-oxoglutarate dehydrogenase complex    |
| GRIN2A      | 2.52        | up         | glutamate [NMDA] receptor subunit epsilon-1 isoform 2 precursor                                      |
| DGKH        | 2.49        | up         | diacylglycerol kinase eta isoform 1                                                                  |
| MT2A        | 2.28        | up         | metallothionein-2                                                                                    |
| CACNA1G     | 1.58        | up         | voltage-dependent T-type calcium channel subunit alpha-1G isoform 14                                 |
| KCNQ2       | 1.55        | up         | potassium voltage-gated channel subfamily KQT member 2 isoform c                                     |

**Table S3.** Primer sequences for qRT-PCR analysis.

| <b>Gene Symbol</b> | <b>Forward Primer</b>         | <b>Reverse Primer</b>          |
|--------------------|-------------------------------|--------------------------------|
| SNAP29             | 5'- TTCGACGATGACGTGGAAGAG-3'  | 5'- GGTACTGCTGCCTGTCAATGG-3'   |
| UFD1L              | 5'-CCTCAGCCCTCGATCAACTC-3'    | 5'-CAGTACACCGCAGTGTGTCAT-3'    |
| ZDHHC8             | 5'-CCCTCTCCTGTGCGCTATG-3'     | 5'-TCGCCAAAGAGTGAGTCAGTC-3'    |
| PDLIM5             | 5'-AAAGGAAAAGATACCCCTTCACG-3' | 5'-GTGCTGAAACTTCATGGTGCC-3'    |
| GRIN2A             | 5'-ACGTGACAGAACGCGAACTT-3'    | 5'-TCAGTGCGGTTTCATCAATAACG-3'  |
| HSPA1A             | 5'-TGGTGCAGTCCGACATGAAG-3'    | 5'-GCTGAGAGTCGTTGAAGTAGGC-3'   |
| DGKH               | 5'-CACCTTCTGTAACGTGTGCAG-3'   | 5'-CCATCCTCGTCCTCTATGATGTC-3'  |
| PTEN               | 5'-TGGATTCGACTTAGACTTGACCT-3' | 5'-GCGGTGTCATAATGTCTCTCAG-3'   |
| GDNF               | 5'-TCCAACGGGGGTCTACGG-3'      | 5'-GCCACGACATCCCATAACTTCAT-3'  |
| GNAS               | 5'-CAGAGCCTCCATTGGGGTC-3'     | 5'-GCTTCTCGCTCAACTGGGG-3'      |
| NOS3               | 5'-GGCTGGGTTTATGGGCTGTG-3'    | 5'-CTGAGGGTGTCGTAGGTGATG-3'    |
| MT2A               | 5'-CGCCATGGATCCCAACTG-3'      | 5'-CCTGAAATTGAGTGACCAGAGAAA-3' |
| CACNA1G            | 5'-TGTCTCCGCACGGTCTGTAA-3'    | 5'-AGATACCCAAAGCGACCATCTT-3'   |
| KCNQ2              | 5'-TGACTGCCTGGTACATTGGC-3'    | 5'-CTCTTGGACTTTCAGGGCAAA-3'    |

© 2015 by the authors; licensee MDPI, Basel, Switzerland. This article is an open access article distributed under the terms and conditions of the Creative Commons Attribution license (<http://creativecommons.org/licenses/by/4.0/>).
